# Supplementary material
Source: PubMed Central journal article supplement (PMC9152878)
Supplement: NIHMS1807599-supplement-1.pdf [file NIHMS1807599-supplement-1.pdf]

**Repository eTable 1.** Demographics of asthmatic subjects.

|                                    |            |
|------------------------------------|------------|
| # of Asthmatic Subjects            | 17         |
| Age (years)                        | 38 ± 11    |
| Gender (F/M)                       | 11/6       |
| BMI                                | 27 ± 6     |
| Inhaled Steroids                   | 9          |
| Oral Steroids                      | 0          |
| Allergy                            | 17         |
| FEV <sub>1</sub> (liters)          | 2.98 ± 0.6 |
| FEV <sub>1</sub> (% predicted)     | 90 ± 12    |
| FeNO (ppb)                         | 36 ± 42    |
| IgE (IU/ml)                        | 370 ± 899  |
| Blood eosinophils (cells/ $\mu$ l) | 222 ± 113  |
| Blood eosinophils (%)              | 3.8 ± 1.8  |

Data are presented as mean ± standard deviation.

Repository eFigure 1

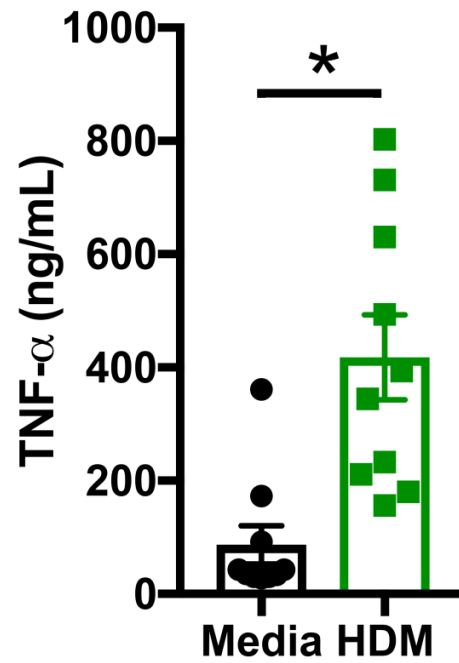

BALF macrophages from asthmatic subjects ( $n = 10$ ) were cultured with or without house dust mite (HDM,  $10 \mu\text{g/ml}$ ) for 24 hours and the quantity of TNF- $\alpha$  present in the media was quantified by ELISA ( $p = 0.002$ , Wilcoxon matched-pairs signed rank test).

Repository eFigure 2.

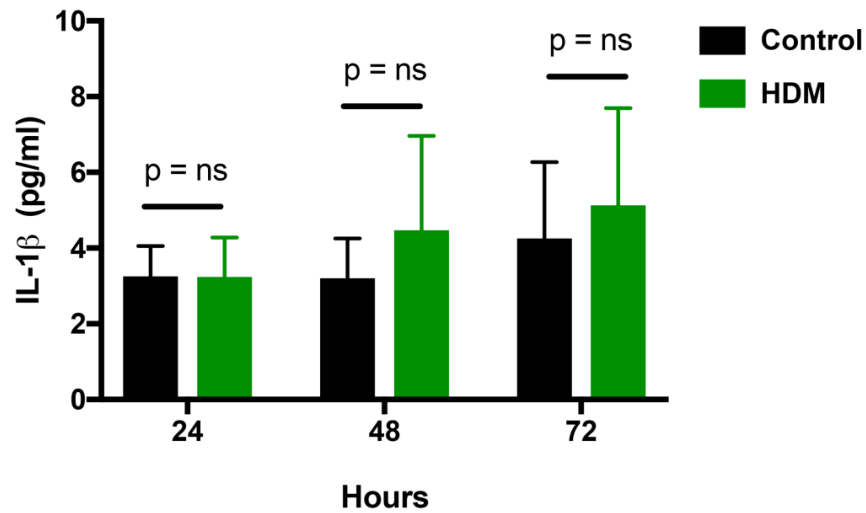

**House dust mite stimulation for up to 72 hours does not induce significant increases in IL-1 $\beta$  secretion by human monocyte-derived macrophages.** Human monocyte-derived macrophages from 10 subjects were stimulated with house dust mite (HDM) (10  $\mu$ g/ml) and the amount of IL-1 $\beta$  secreted into the media was quantified by ELISA. No difference was found in the quantity of IL-1 $\beta$  secreted by human monocyte-derived macrophages treated with HDM versus control at 24, 48 or 72 hours (Wilcoxon matched-pairs signed rank test).
